# Supplementary material
Source: PubMed Central journal article supplement (PMC2984172)
Supplement: 1002598107_pnas.201002598SI.pdf [file 1002598107_pnas.201002598SI.pdf]

# Supporting Information

Walker et al. 10.1073/pnas.1002598107

**Table S1. Database for 128 lowland societies including language family, postmarital residence, paternity beliefs, and data sources**

| Society/language | ISO code | Language family | Postmarital residence | Paternity belief | Sources               |
|------------------|----------|-----------------|-----------------------|------------------|-----------------------|
| Amuesha          | ame      | Arawak          | Uxorilocal            | Singular         | 1                     |
| Cabiyari         | cbb      | Arawak          | Virilocal             |                  | 2                     |
| Campa            | cni      | Arawak          | Virilocal             | Singular         | 3, 4                  |
| Curripaco        | bwi/kpc  | Arawak          | Virilocal             | Weak             | 4–6                   |
| Wayuu            | guc      | Arawak          | Uxorilocal            |                  | 7, 8                  |
| Locono           | arw      | Arawak          | Uxorilocal            |                  | 4                     |
| Machiguenga      | mcb      | Arawak          | Uxorilocal            | Singular         | 4, 9                  |
| Mehinaku         | mmh      | Arawak          | Ambi-/neolocal        | Universal        | 10, 11                |
| Mojo             | trn      | Arawak          | Virilocal             |                  | 4                     |
| Palikur          | plu      | Arawak          | Virilocal             | Singular         | 4, 12, ISA website    |
| Anu              | pbg      | Arawak          | Ambi-/neolocal        |                  | 4, 13–15              |
| Paressi          | pab      | Arawak          | Uxorilocal            |                  | 3, 4                  |
| Piro             | pib      | Arawak          | Uxorilocal            |                  | 16                    |
| Taino            | tnq      | Arawak          | Virilocal             |                  | 4                     |
| Terena           | ter      | Arawak          | Ambi-/neolocal        |                  | 4, 17, ISA website    |
| Wapishana        | wap      | Arawak          | Virilocal             |                  | 4, 18, 19             |
| Yawalapiti       | yaw      | Arawak          | Virilocal             |                  | 20                    |
| Yukuna           | ycn      | Arawak          | Virilocal             |                  | 4, 21                 |
| Apalai           | apy      | Carib           | Uxorilocal            |                  | 22, ISA website       |
| Arara            | aap      | Carib           | Uxorilocal            | Partible         | ISA website           |
| Bacairi          | bkq      | Carib           | Virilocal             |                  | 4, 23                 |
| Carinya          | car      | Carib           | Ambi-/neolocal        |                  | 4                     |
| Kalapalo         | kui      | Carib           | Ambi-/neolocal        | Singular         | 24, 25                |
| Karihona         | cbd      | Carib           | Uxorilocal            |                  | 26                    |
| Kuikuro          | kui      | Carib           | Ambi-/neolocal        | Weak             | 27                    |
| Macusi           | mbc      | Carib           | Uxorilocal            |                  | 4, 18, 28             |
| Panare           | pbh      | Carib           | Uxorilocal            |                  | 4, 29, 30             |
| Taulipang        | aoc      | Carib           | Uxorilocal            |                  | 4, 31, ISA website    |
| Trio             | tri      | Carib           | Uxorilocal            | Singular         | 32, 33                |
| Txicao           | txi      | Carib           | Uxorilocal            |                  | 34                    |
| Waica            | ake      | Carib           | Ambi-/neolocal        | Weak             | 4, 35                 |
| Waimiri-Atroari  | atr      | Carib           | Uxorilocal            | Partible         | 36                    |
| Waiwai           | waw      | Carib           | Uxorilocal            | Weak             | 4, 37–39              |
| Wayana           | way      | Carib           | Uxorilocal            | Partible         | 40, ISA website       |
| Yabarana         | yar      | Carib           | Uxorilocal            |                  | 4                     |
| Yekwana          | mch      | Carib           | Uxorilocal            | Weak             | 4, 13–15, 41, 42      |
| Yukpa            | yup      | Carib           | Uxorilocal            | Weak             | 4, 43, 44             |
| Apinaye          | apn      | Je              | Uxorilocal            | Partible         | 4, 45                 |
| Bororo           | bor      | Je              | Uxorilocal            | Partible         | 4, 46                 |
| Canela           | ram      | Je              | Uxorilocal            | Universal        | 47                    |
| Caraja           | kpj      | Je              | Uxorilocal            |                  | 4, 48, 49             |
| Chiquitano       | cax      | Je              | Uxorilocal            |                  | 3                     |
| GaviaoParkateje  | gvp      | Je              | Uxorilocal            |                  | ISA website           |
| Guato            | gta      | Je              | Ambi-/neolocal        |                  | 4, ISA website        |
| Kayapo           | txu      | Je              | Uxorilocal            | Partible         | 4, 50–52              |
| Kraho            | xra      | Je              | Uxorilocal            | Partible         | 53–55                 |
| Krikati          | xri      | Je              | Uxorilocal            | Partible         | 56                    |
| Rikbaktsa        | rkb      | Je              | Uxorilocal            | Partible         | 57, ISA website       |
| Suya             | suy      | Je              | Uxorilocal            | Partible         | 58, ISA website       |
| Xavante          | xav      | Je              | Uxorilocal            | Partible         | 4, 59                 |
| Xerente          | xer      | Je              | Uxorilocal            |                  | 3, 4, 59, ISA website |
| Xocleng          | xok/zkp  | Je              | Uxorilocal            | Partible         | 4, ISA website        |
| Amahuaca         | amc      | Pano            | Virilocal             |                  | 4, 60, 61             |
| Cashibo          | cbr      | Pano            | Uxorilocal            |                  | 3                     |
| Cashinahua       | cbs      | Pano            | Uxorilocal            | Partible         | 62                    |
| Chacobo          | cao      | Pano            | Uxorilocal            | Singular         | 4, 63                 |
| Conibo           | shp      | Pano            | Uxorilocal            | Partible         | 4, 64, 65             |

Table S1. Cont.

| Society/language | ISO code | Language family | Postmarital residence | Paternity belief | Sources                                             |
|------------------|----------|-----------------|-----------------------|------------------|-----------------------------------------------------|
| Marubo           | mzr      | Pano            | Ambi-/neolocal        | Partible         | 54, 55                                              |
| Matis            | mpq      | Pano            | Virilocal             | Universal        | 66                                                  |
| Matses           | mcf      | Pano            | Virilocal             |                  | 67                                                  |
| Sharanahua       | mcd      | Pano            | Uxorilocal            | Partible         | 4, 68                                               |
| Yaminahua        | yaa      | Pano            | Ambi-/neolocal        | Partible         | 69                                                  |
| Bara             | bao      | Tukano          | Virilocal             | Singular         | 70                                                  |
| Cubeo            | cub      | Tukano          | Virilocal             |                  | 2, 4, 71                                            |
| Desano           | des      | Tukano          | Virilocal             |                  | 72, 73                                              |
| Macuna           | myy      | Tukano          | Virilocal             | Singular         | 74                                                  |
| Tatuyo           | tav      | Tukano          | Virilocal             | Singular         | 75                                                  |
| Barasana         | bsn      | Tukano          | Virilocal             | Singular         | 76, 77                                              |
| Wanano           | gvc      | Tukano          | Virilocal             | Partible         | 78, 79                                              |
| Siona-Secoya     | snn      | Tukano          | Virilocal             | Singular         | 80, 81                                              |
| Ache             | guq      | Tupi            | Ambi-/neolocal        | Partible         | 82                                                  |
| Arawete          | awt      | Tupi            | Uxorilocal            | Universal        | 83, 84                                              |
| Asurini do Xingu | asn      | Tupi            | Uxorilocal            | Partible         | 3, ISA website                                      |
| Aweti            | awe      | Tupi            | Ambi-/neolocal        | Partible         | 4, ISA website                                      |
| Camayura         | kay      | Tupi            | Virilocal             |                  | 4, 85                                               |
| Guarani          | kgk      | Tupi            | Virilocal             | Singular         | 4                                                   |
| Cinta Larga      | cin      | Tupi            | Virilocal             | Partible         | 85, 86, ISA website                                 |
| Guaja            | gvj      | Tupi            | Ambi-/neolocal        | Universal        | 4, 87                                               |
| Kaapor           | urb      | Tupi            | Uxorilocal            | Partible         | 88, ISA website                                     |
| Kaiabi           | kyz      | Tupi            | Uxorilocal            |                  | 89, ISA website                                     |
| Kawahiv          | pah      | Tupi            |                       | Partible         | 90, ISA website                                     |
| Zo'e             | pto      | Tupi            | Uxorilocal            | Partible         | amazoe.org.br/textoreferencia/ensaio_livro_tupi.pdf |
| Maue             | mav      | Tupi            | Virilocal             |                  | 4                                                   |
| Mundurucu        | myu      | Tupi            | Uxorilocal            | Partible         | 4, 91, 92                                           |
| Siriono          | srq      | Tupi            | Uxorilocal            |                  | 4, 93–95                                            |
| Surui            | sru      | Tupi            | Virilocal             |                  | 96, ISA website                                     |
| Tapirape         | taf      | Tupi            | Uxorilocal            | Partible         | 3, 4, 97                                            |
| Tenetehara       | gub      | Tupi            | Uxorilocal            | Singular         | 4                                                   |
| Tupari           | tpr      | Tupi            | Uxorilocal            | Partible         | 13–15                                               |
| Tupinamba        | tpn      | Tupi            | Uxorilocal            |                  | 4, 84                                               |
| Wayampi          | oym      | Tupi            | Ambi-/neolocal        |                  | 98                                                  |
| Yuqui            | yuq      | Tupi            | Ambi-/neolocal        | Partible         | 99                                                  |
| Cocama           | cod      | Tupi            | Virilocal             |                  | 3, 4, ISA website                                   |
| Trumai           | tpy      | unclassified    | Virilocal             |                  | 4, 100                                              |
| Waorani          | auc      | unclassified    | Uxorilocal            | Partible         | 101, 102                                            |
| Warao            | wba      | unclassified    | Uxorilocal            | Singular         | 4, 103, 104                                         |
| Yaruro           | yae      | unclassified    | Uxorilocal            | Singular         | 4, 105                                              |
| Mura-Piraha      | myp      | Mura            | Ambi-/neolocal        | Singular         |                                                     |
| Wari             | pav      | Chapacura       | Ambi-/neolocal        | Partible         | 106                                                 |
| Witoto           | hto      | Witoto          | Virilocal             |                  | 3, 4, 61                                            |
| Bora             | boa      | Witoto          | Virilocal             |                  | 67                                                  |
| Shiriana         | shb      | Yanomam         | Uxorilocal            | Partible         | 4, 107                                              |
| Yanomamo         | guu      | Yanomam         | Virilocal             |                  | 4, 108, 109                                         |
| Yanomam          | wca      | Yanomam         | Ambi-/neolocal        | Partible         | 42                                                  |
| Sanuma           | xsu      | Yanomam         | Uxorilocal            | Partible         | 4, 110, 111                                         |
| Ayoreo           | ayo      | Zamuco          | Virilocal             |                  | 94, 95                                              |
| Chamacoco        | ceg      | Zamuco          | Uxorilocal            |                  | 4, 112                                              |
| Zuruaha          | swx      | Arawa           |                       | Partible         | ISA website                                         |
| Jamamadi         | jaa      | Arawa           | Uxorilocal            | Partible         | ISA website                                         |
| Kulina           | cul      | Arawa           | Uxorilocal            | Universal        | 113, 114                                            |
| Paumari          | pad      | Arawa           | Ambi-/neolocal        | Partible         | ISA website                                         |
| Iranxe           | irn      | unclassified    | Uxorilocal            | Partible         | ISA website                                         |
| Chayahuita       | cbt      | Cahuapana       | Virilocal             |                  | 4                                                   |
| Tunebo           | tuf      | Chibcha         | Virilocal             |                  | 4                                                   |
| Bari             | mot      | Chibcha         | Uxorilocal            | Partible         | 115, 116                                            |
| Guahibo          | guh      | Guahibo         | Uxorilocal            |                  | 4, 117                                              |
| Hiwi             | cui      | Guahibo         | Ambi-/neolocal        | Singular         | 4, 118                                              |
| Jivaro           | jiv      | Jivaro          | Ambi-/neolocal        |                  | 4, 119                                              |

Table S1. Cont.

| Society/language | ISO code | Language family | Postmarital residence | Paternity belief | Sources     |
|------------------|----------|-----------------|-----------------------|------------------|-------------|
| Katukina         | kav      | Katukina        | Ambi-/neolocal        | Singular         | ISA website |
| Kanamari         | knm      | Katukina        | Uxorilocal            | Partible         | ISA website |
| Maku             | yab      | Maku            | Virilocal             |                  | 120         |
| Tsimane          | cas      | Mosetene        | Uxorilocal            | Singular         | 121         |
| Nambiquara       | nab      | Nambiquara      | Ambi-/neolocal        |                  | 4, 122, 123 |
| Piaroa           | pid      | Saliva          | Ambi-/neolocal        | Singular         | 4, 124–126  |
| Ese Eja          | ese      | Tacana          | Uxorilocal            | Partible         | 20          |
| Caduveo          | kbc      | Mataco          | Uxorilocal            |                  | 127         |
| Toba             | tob      | Mataco          | Ambi-/Neolocal        | Singular         | 4, 128      |
| Wichi            | mzh      | Mataco          | Uxorilocal            | Singular         | 4           |

1. Wise M (1991) Amuesha. *Encyclopedia of World Cultures: South America*, ed Wilbert J (G. K. Hall, Boston), pp 37–40.
2. Correa F (1991) Cubeo. *Encyclopedia of World Cultures: South America*, ed Wilbert J (G. K. Hall, Boston), pp 139–142.
3. Flowers N (1991) Campa. *Encyclopedia of World Cultures: South America*, ed Wilbert J (G. K. Hall, Boston), pp 90–92.
4. Gray J (1999) A corrected ethnographic atlas. *World Cultures J* 10:24–85.
5. Valentine P (2002) Fathers that never exist: Exclusion of the role of shared father among the Curripaco of the Northwest Amazon. *Cultures of Multiple Fathers: Theory and Practice of Partible Paternity in Lowland South America*, eds Beckerman S, Valentine P (University Press of Florida, Gainesville, FL), pp 178–191.
6. Wright R (1991) Baniwa-Curripaco-Wakuenai. *Encyclopedia of World Cultures: South America*, ed Wilbert J (G. K. Hall, Boston), pp 76–80.
7. Perrin M (1987) *The Way of the Dead Indians: Guajiro Myths and Symbols* (University of Texas Press, Austin, TX).
8. Perrin M (1991) Guajiro. *Encyclopedia of World Cultures: South America*, ed Wilbert J (G. K. Hall, Boston), pp 167–170.
9. Johnson A (2003) *Families of the Forest: The Matsigenka Indians of the Peruvian Amazon* (University of California Press, Berkeley, CA).
10. Gregor T (1977) *Mehinaku: The Drama of Daily Life in a Brazilian Indian Village* (University of Chicago Press, Chicago).
11. Gregor T (1985) *Anxious Pleasures: The Sexual Lives of an Amazonian People* (University of Chicago Press, Chicago).
12. Arnaud E (1991) Palikur. *Encyclopedia of World Cultures: South America*, ed Wilbert J (G. K. Hall, Boston), pp 260–264.
13. Wilbert J (1991) *Encyclopedia of World Cultures: South America* (G. K. Hall, Boston).
14. Wilbert J (1991) Paraujano. *Encyclopedia of World Cultures: South America*, ed Wilbert J (G. K. Hall, Boston), pp 267–268.
15. Wilbert J (1991) Tupari. *Encyclopedia of World Cultures: South America*, ed Wilbert J (G. K. Hall, Boston), pp 339–341.
16. Matteson E (1991) Piro. *Encyclopedia of World Cultures: South America*, ed Wilbert J (G. K. Hall, Boston), pp 279–281.
17. Carvalho F, Telarolli Junior R (1991) Terena. *Encyclopedia of World Cultures: South America*, ed Wilbert J (G. K. Hall, Boston), pp 324–327.
18. Farabee W (1918) *The Central Arawaks* (University Museum, University of Pennsylvania, Anthropological Publications, Philadelphia), Vol IX.
19. Foster N (1991) Wapishana. *Encyclopedia of World Cultures: South America*, ed Wilbert J (G. K. Hall, Boston), pp 354–356.
20. Zeleny M (1991) Yawalipiti. *Encyclopedia of World Cultures: South America*, ed Wilbert J (G. K. Hall, Boston), pp 377–380.
21. Reichel E (1991) Yukuna. *Encyclopedia of World Cultures: South America*, ed Wilbert J (G. K. Hall, Boston), pp 385–390.
22. van Velthem L (1991) Apalai. *Encyclopedia of World Cultures: South America*, ed Wilbert J (G. K. Hall, Boston), pp 20–24.
23. Picchi D (1991) Bakairi. *Encyclopedia of World Cultures: South America*, ed Wilbert J (G. K. Hall, Boston), pp 73–75.
24. Basso E (1970) Xingu Carib kinship terminology and marriage: Another view. *Southwest J Anthropol* 26:402–416.
25. Basso E (1973) *The Kalapalo Indians of Central Brazil* (Holt, Rinehart and Winston, Austin, TX).
26. Schindler H (1991) Karihona. *Encyclopedia of World Cultures: South America*, ed Wilbert J (G. K. Hall, Boston), pp 191–195.
27. Carneiro R (1956) Extra-marital sex freedom among the Kuikuro indians of Mato Grosso. *Rev do Museu Paulista* 10:135–142.
28. Diniz E (1991) Makushi. *Encyclopedia of World Cultures: South America*, ed Wilbert J (G. K. Hall, Boston), pp 218–219.
29. Dumont J (1972) *Under the Rainbow: Nature and Supernature Among the Panare Indians* (University of Texas Press, Austin, TX).
30. Henley P (1991) Panare. *Encyclopedia of World Cultures: South America*, ed Wilbert J (G. K. Hall, Boston), pp 264–267.
31. Thomas D (1991) Pemon. *Encyclopedia of World Cultures: South America*, ed Wilbert J (G. K. Hall, Boston), pp 271–273.
32. Riviere P, ed (1969) *Marriage Among the Trio: A Principle of Social Organisation* (Oxford University Press, Oxford).
33. Riviere P (1991) Trio. *Encyclopedia of World Cultures: South America*, ed Wilbert J (G. K. Hall, Boston), pp 334–337.
34. Menget P (1977) *Au nom des autres. Classification des relations sociales chez les Txicao du Haut-Xingu (Bresil)* (University of Paris, Paris).
35. Colson A (1991) Akawaio. *Encyclopedia of World Cultures: South America*, ed Wilbert J (G. K. Hall, Boston), pp 30–33.
36. Baines S (1991) Waimiri-Atroari. *Encyclopedia of World Cultures: South America*, ed Wilbert J (G. K. Hall, Boston), pp 341–345.
37. Fock N (1963) *Waiwai. Religion and Society of an Amazonian Tribe* (National Museum of Denmark, Copenhagen).
38. Hornborg A (2005) Ethnogenesis, regional integration, and ecology in prehistoric Amazonia. *Curr Anthropol* 46:589–620.
39. Howard C (1991) Waiwai. *Encyclopedia of World Cultures: South America*, ed Wilbert J (G. K. Hall, Boston), pp 345–348.
40. Hurault J (1965) La population des Indiens de Guyane française. I. Vue historique generale. *Population (Paris)* 20:603–632.
41. Arvelo-Jimenez N (1976) Dos conceptos de marginalidad: El maquiritare y el desarrollista. *América Indígena: Órgano Trimestral del Instituto Indigenista Interamericano* 36:303–312.
42. Ales C (2002) A story of an unspontaneous generation: Yanomami male co-procreation and the theory of substances. *Cultures of Multiple Fathers: Theory and Practice of Partible Paternity in Lowland South America*, eds Beckerman S, Valentine P (University Press of Florida, Gainesville, FL), pp 62–85.
43. Paolisso M (1991) Yukpa. *Encyclopedia of World Cultures: South America*, ed Wilbert J (G. K. Hall, Boston), pp 382–385.
44. Halbmayer E (2004) The one who feeds has the rights: Adoption and fostering of kin, affines and enemies among the Yukpa and other Carib-speaking Indians of Lowland South America. *Cross-Cultural Approaches to Adoption*, ed Bowie F (Routledge, London), pp 145–164.
45. Da Matta R (1979) The Apinaye relationship system: Terminology and ideology. *Dialectical Societies: The Ge and Bororo of Central Brazil*, ed Maybury-Lewis D (Harvard University Press, Cambridge, MA), pp 83–127.
46. Crocker J (1985) *Vital Souls: Bororo Cosmology, Natural Symbolism, and Shamanism* (University of Arizona Press, Tucson, AZ).
47. Crocker W, Crocker J (2004) *The Canela: Kinship, Ritual, and Sex in an Amazonian Tribe* (Wadsworth/Thomson, Belmont, CA).
48. Lipkind W (1948) *The Caraja. Handbook of South American Indians*, ed Steward J (Smithsonian, Washington, DC).
49. Taveira E, Costa M (1991) Karaja. *Encyclopedia of World Cultures: South America*, ed Wilbert J (G. K. Hall, Boston), pp 187–191.
50. Lea V (2002) Multiple paternity among the Mébengokre (Kayapó, Jê) of Central Brazil. *Cultures of Multiple Fathers: Theory and Practice of Partible Paternity in Lowland South America*, eds Beckerman S, Valentine P (University Press of Florida, Gainesville, FL), pp 105–122.
51. Werner D (1984) *Amazon Journal: An Anthropologist's Year Among Brazil's Mekranoti Indians* (Simon and Schuster, New York).
52. Turner T (1966) Social structure and political organization among the Northern Kayapo. PhD dissertation (Harvard University, Cambridge, MA).
53. Melatti J (1979) The relationship system of the Krahó. *Dialectical Societies: The Ge and Bororo of Central Brazil*, ed Maybury-Lewis D (Harvard University Press, Cambridge, MA), pp 46–79.
54. Melatti J (1991) Craho. *Encyclopedia of World Cultures: South America*, ed Wilbert J (G. K. Hall, Boston), pp 135–139.
55. Melatti J (1991) Marubo. *Encyclopedia of World Cultures: South America*, ed Wilbert J (G. K. Hall, Boston), pp 220–224.
56. Lave J (1979) Cycles and trends in Krikati naming practices. *Dialectical Societies: The Ge and Bororo of Central Brazil*, ed Maybury-Lewis D (Harvard University Press, Cambridge, MA), pp 16–45.
57. Arruda R (1991) Rikbaktsa. *Encyclopedia of World Cultures: South America*, ed Wilbert J (G. K. Hall, Boston), pp 286–288.
58. Seeger A (1991) Suya. *Encyclopedia of World Cultures: South America*, ed Wilbert J (G. K. Hall, Boston), pp 314–317.

59. Maybury-Lewis D (1967) *Akwẽ-Shavante Society* (Clarendon, Oxford).
60. Dole G (1991) Amahuaca. *Encyclopedia of World Cultures: South America*, ed Wilbert J (G. K. Hall, Boston), pp 33–36.
61. Farabee W (1922) *Indian Tribes of Eastern Peru: Papers of the Peabody Museum of American Archaeology and Ethnology*, Vol X (Peabody Museum, Cambridge, MA).
62. Kensinger K (2002) The dilemmas of co-paternity in Cashinahua society. *Cultures of Multiple Fathers: Theory and Practice of Partible Paternity in Lowland South America*, eds Beckerman S, Valentine P (University Press of Florida, Gainesville, FL), pp 14–26.
63. Balzano S (1991) Chacobo. *Encyclopedia of World Cultures: South America*, ed Wilbert J (G. K. Hall, Boston), pp 104–107.
64. Behrens C (1991) Shipibo. *Encyclopedia of World Cultures: South America*, ed Wilbert J (G. K. Hall, Boston), pp 303–306.
65. Hern W (1992) Shipibo polygyny and patrilocality. *Am Ethnologist* 19:501–522.
66. Erikson P (2002) Several fathers in one's cap: Polyandrous conception among the Panoan Matis (Amazonas, Brazil). *Cultures of Multiple Fathers: Theory and Practice of Partible Paternity in Lowland South America*, eds Beckerman S, Valentine P (University Press of Florida, Gainesville, FL), pp 123–136.
67. Steward J, Metraux A (1948) Tribes of the Peruvian and Ecuadorian Montana. *Handbook of South American Indians*, ed Steward J (Smithsonian, Washington, DC).
68. Siskind J (1973) Tropical forest hunters and the economy of sex. *Peoples and Cultures of Native South America*, ed Gross D (Doubleday, New York), pp 226–240.
69. Hill K, Kaplan H (1990) *The Newly Contacted Yora (Yaminahua) of Manu National Park* (AnthroQuest: The L.S.B. Leakey Foundation News, Pasadena, CA).
70. Jackson J (1983) *The Fish People: Linguistic Exogamy and Tukanoan Identity in Northwest Amazonia* (Cambridge University Press, Cambridge, UK).
71. Goldman I (1963) *The Cubeo Indians of the Northwest Amazon* (University of Illinois Press, Champaign, IL).
72. Reichel-Dolmatoff G (1968) *Desana, Simbolismo de los Indios Tucanos del Vaupes* (Universidade de los Andes, Bogota, Colombia).
73. Reichel-Dolmatoff G (1991) Desana. *Encyclopedia of World Cultures: South America*, ed Wilbert J (G. K. Hall, Boston), pp 60–64.
74. Arhem K (1991) Macuna. *Encyclopedia of World Cultures: South America*, ed Wilbert J (G. K. Hall, Boston), pp 212–215.
75. Bidou P (1991) Tatuyo. *Encyclopedia of World Cultures: South America*, ed Wilbert J (G. K. Hall, Boston), pp 322–324.
76. Hugh-Jones C (1979) *From the Milk River: Spatial and Temporal Processes in Northwest Amazonia* (Cambridge University Press, Cambridge, UK).
77. Hugh-Jones S (1979) *The Palm and the Pleiades: Initiation and Cosmology in Northwest Amazonia* (Cambridge University Press, Cambridge, UK).
78. Chernela J (1991) Wanano. *Encyclopedia of World Cultures: South America*, ed Wilbert J (G. K. Hall, Boston), pp 348–351.
79. Chernela J (2002) Fathering in the Northwest Amazon of Brazil: Competition, monopoly, and partition. *Cultures of Multiple Fathers: Theory and Practice of Partible Paternity in Lowland South America*, eds Beckerman S, Valentine P (University Press of Florida, Gainesville, FL), pp 160–176.
80. Vickers W (1991) Siona-Secoya. *Encyclopedia of World Cultures: South America*, ed Wilbert J (G. K. Hall, Boston), pp 306–309.
81. Vickers W (2002) Sexual theory, behavior and paternity among the Siona and Secoya Indians of Eastern Ecuador. *Cultures of Multiple Fathers: Theory and Practice of Partible Paternity in Lowland South America*, eds Beckerman S, Valentine P (University Press of Florida, Gainesville, FL), pp 221–246.
82. Hill K, Hurtado A (1996) *Ache Life History: The Ecology and Demography of a Foraging People* (Aldine de Gruyter, Hawthorne, NY).
83. Viveiros de Castro E (1991) Arawete. *Encyclopedia of World Cultures: South America*, ed Wilbert J (G. K. Hall, Boston), pp 55–58.
84. Viveiros de Castro E (1992) *From the Enemy's Point of View: Humanity and Divinity in an Amazonian Society* (University of Chicago Press, Chicago).
85. Junqueira C (2002) *Sexo e desigualdade entre os Kamaiurá e os Cinta Larga* (Olha d'Água, CAPES, Sao Paulo, Brazil).
86. Junqueira C (1991) Cinta Larga. *Encyclopedia of World Cultures: South America*, ed Wilbert J (G. K. Hall, Boston), pp 126–129.
87. Cormier L (2003) *Kinship with monkeys: The Guajá Foragers of Eastern Amazonia* (Columbia University Press, New York).
88. Balee W (1994) *Footprints of the Forest. Ka'apor Ethnobotany: The Historical Ecology of Plant Utilization by an Amazonian People* (Columbia University Press, New York).
89. Oakdale S (2005) *I Foresee My Life: The Ritual Performance of Autobiography in an Amazonian Community* (University of Nebraska Press, Lincoln, NE).
90. Kracke W (1978) *Force and Persuasion: Leadership in an Amazonian Society* (University of Chicago Press, Chicago).
91. Murphy R (1960) *Headhunter's Heritage: Social and Economic Change Among the Mundurucu Indians* (University of California Press, Berkeley, CA).
92. Murphy R, Murphy Y (1974) *Women of the Forest* (University of Columbia Press, New York).
93. Holmberg A (1969) *Nomads of the Long Bow: The Siriono of Eastern Bolivia* (Waveland Press, Long Grove, IL).
94. Califano M (1991) Ayoreo. *Encyclopedia of World Cultures: South America*, ed Wilbert J (G. K. Hall, Boston), pp 69–72.
95. Califano M (1991) Siriono. *Encyclopedia of World Cultures: South America*, ed Wilbert J (G. K. Hall, Boston), pp 309–311.
96. Mindlin B (1991) Surui. *Encyclopedia of World Cultures: South America*, ed Wilbert J (G. K. Hall, Boston), pp 312–314.
97. Wagley C (1977) *Welcome of Tears: The Tapirapé Indians of Central Brazil* (Waveland Press, Long Grove, IL).
98. Grenard P, Grenard F (1991) Wayapi. *Encyclopedia of World Cultures: South America*, ed Wilbert J (G. K. Hall, Boston), pp 360–364.
99. Stearman A (1991) Yuqui. *Encyclopedia of World Cultures: South America*, ed Wilbert J (G. K. Hall, Boston), pp 390–395.
100. Murphy R, Quain B (1955) *The Trumai Indians of Central Brazil. American Ethnological Society Monograph 24* (University of Washington Press, Seattle, WA).
101. Yost J (1991) Waorani. *Encyclopedia of World Cultures: South America*, ed Wilbert J (G. K. Hall, Boston), pp 351–354.
102. Rival L (2002) *Trekking Through History: The Huaorani of Amazonian Ecuador* (University of Columbia Press, New York).
103. Kirchhoff P (1948) The Warrau. *Handbook of South American Indians*, ed Steward J (Smithsonian, Washington, DC), pp 869–881.
104. Heinen H, Wilbert W (2002) Paternal uncertainty and ritual kinship among the Warao. *Cultures of Multiple Fathers: Theory and Practice of Partible Paternity in Lowland South America*, eds Beckerman S, Valentine P (University Press of Florida, Gainesville, FL), pp 210–220.
105. Gragson T (1991) Pume. *Encyclopedia of World Cultures: South America*, ed Wilbert J (G. K. Hall, Boston), pp 282–285.
106. Conklin B (2001) *Consuming Grief: Compassionate Cannibalism in an Amazonian Society* (University of Texas Press, Austin, TX).
107. Peters J (1998) *Life Among the Yanomami* (Broadview Press, Peterborough, ON).
108. Chagnon N (1968) *Yanomamö: The Fierce People* (Holt, Rinehart and Winston, Austin, TX).
109. Hames R (1991) Yanomamo. *Encyclopedia of World Cultures: South America*, ed Wilbert J (G. K. Hall, Boston), pp 374–377.
110. Ramos A, Albert B (1977) Yanoama descent and affinity: The Sanuma/Yanomam contrast. *Actes du XLII Congrès International des Americanistes Paris 2*:71–90.
111. Ramos A (1995) *Sanuma Memories* (University of Wisconsin Press, Madison, WI).
112. Cordeu E (1991) Chamacoco. *Encyclopedia of World Cultures: South America*, ed Wilbert J (G. K. Hall, Boston), pp 107–110.
113. Pollock D (1991) Culina. *Encyclopedia of World Cultures: South America*, ed Wilbert J (G. K. Hall, Boston), pp 145–149.
114. Pollock D (2002) Partible paternity and multiple paternity among the Culina. *Cultures of Multiple Fathers: Theory and Practice of Partible Paternity in Lowland South America*, eds Beckerman S, Valentine P (University Press of Florida, Gainesville, FL), pp 42–61.
115. Beckerman S (1991) Bari. *Encyclopedia of World Cultures: South America*, ed Wilbert J (G. K. Hall, Boston), pp 82–85.
116. Beckerman S, Valentine P, eds (2002) *Cultures of Multiple Fathers: The Theory and Practice of Partible Paternity in Lowland South America* (University Press of Florida, Gainesville, FL).
117. Ortíz F (1991) Guahibo-Sikuani. *Encyclopedia of World Cultures: South America*, ed Wilbert J (G. K. Hall, Boston), pp 164–166.
118. Arcand B (1991) Cuiva. *Encyclopedia of World Cultures: South America*, ed Wilbert J (G. K. Hall, Boston), pp 142–145.
119. Harner M (1972) *The Jivaro: People of the Sacred Waterfalls* (University of California Press, Berkeley, CA).
120. Silverwood-Cope P (1990) *Os Makú. Povo caçador do noroeste da Amazônia* (Universidade de Brasília, Brasília, Brazil).
121. Riester J (1991) Chimane. *Encyclopedia of World Cultures: South America*, ed Wilbert J (G. K. Hall, Boston), pp 111–113.
122. Levi-Strauss C (1948) La Vie familiale et sociale des Indiens Nambikwara. *J Soc Am* 37:1–132.
123. Price D (1985) Nambiquara brothers. *Working Papers on South American Indians no. 7*, ed Kensinger K (Bennington College, Bennington, VT), pp 16–19.
124. Kaplan J (1972) Cognition, endogamy, and tekonymy: The Piaroa example. *Southwest J Anthropol* 28:282–297.
125. Kaplan J (1975) *The Piaroa, a People of the Orinoco Basin: A Study in Kinship and Marriage* (Clarendon, Oxford).
126. Rodrigues A, Monterrey N (2002) A comparative analysis of paternity among the Piaroa and the Ye'kwana of the Guyana Region of Venezuela. *Cultures of Multiple Fathers: Theory and Practice of Partible Paternity in Lowland South America*, eds Beckerman S, Valentine P (University Press of Florida, Gainesville, FL), pp 192–209.
127. Ribeiro D (1974) Kadiweu kinship. *Native South Americans: Ethnology of the Least Known Continent*, ed Lyon P (Little, Brown & Co., Boston), pp 167–183.
128. Tola F (2007) Constitución de la persona sexuada entre los Tobas, Qom, del Chaco Argentino. *Revista Pueblos y Fronteras Digital* 4:1–25.
